# Supplementary material for: Synthesis of large-scale undoped and nitrogen-doped amorphous graphene on MgO substrate by chemical vapor deposition
Source: Royal Society of Chemistry journal article supplement (doi:10.1039/c2jm33209d), 2012-01-01
Supplement: c2jm33209d.pdf [file c2jm33209d.pdf]

## *Supporting Information*

# Synthesis of Large-Scale Undoped and Nitrogen-Doped Amorphous Graphene on MgO Substrate by Chemical Vapor Deposition

*Jin Zhao, Guoyin Zhu, Wen Huang, Zhi He, Xiaomiao Feng, Yanwen Ma\*, Xiaochen Dong, Quli Fan, Lianhui Wang, Zheng Hu, Yinong Lü, Wei Huang\**

\* Authors to whom correspondence should be addressed.

E-mail: iamwhuang@njupt.edu.cn; iamywma@njupt.edu.cn

### **S1. SEM images of *a*-graphene films**

Figure S1 shows the SEM images of *a*-G-650 and *a*-G-750. Both *a*-graphene films are continuous in large area. The cracks in the films should be generated during their transferring process. Judging from the contrast of *a*-graphene with respect of the SiO<sub>2</sub> substrate, we could easily deduce that the *a*-G-650 film is much thinner than *a*-G-750 film.

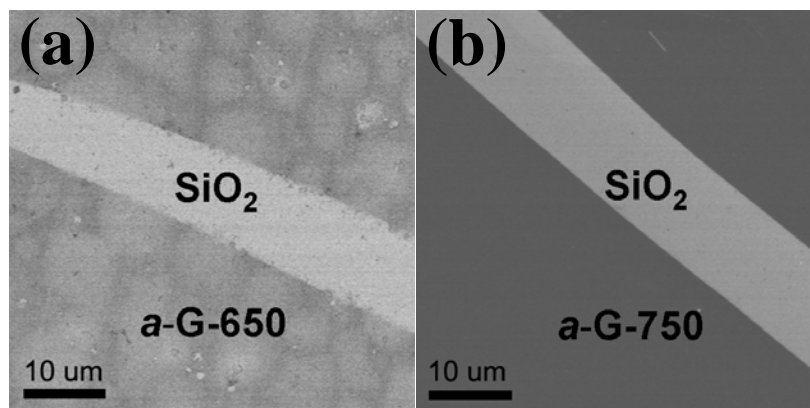

**Figure S1.** SEM images of a-G-650 (a) and a-G-750 films (b) on SiO<sub>2</sub>/Si substrate.

### S2. Nitrogen contents of N-*a*-graphene films measured by XPS

The nitrogen contents of N-a-G-650, N-a-G-700, N-a-G-750 and N-a-G-800 films analyzed by XPS are listed in Table S1.

**Table S1.** Nitrogen to carbon atomic ratio of N-*a*-graphene films.

| Sample                                | N- <i>a</i> -G-650 | N- <i>a</i> -G-700 | N- <i>a</i> -G-750 | N- <i>a</i> -G-800 |
|---------------------------------------|--------------------|--------------------|--------------------|--------------------|
| Nitrogen to carbon atomic ratio (N:C) | 0.088              | 0.096              | 0.085              | 0.086              |

### S3. AFM images of *a*-graphene films

Figure S2 gives the AFM (Agilent 5500) images of *a*-graphene films. The heights of *a*-G-650, *a*-G-700, *a*-G-750 and *a*-G-800 films measured from the line profiles are about 0.8-1.0, 1.2-1.5, 1.8-2.2 and 5.0-5.5 nm, respectively. Which are corresponding to approximately 1-2, 2-3, 4-5, 13-15 layers, respectively.<sup>1-3</sup> As can be seen, there are some bright dots on the surface of

*a*-graphene films. These may be the residual PMMA or some adsorbed impurities during the transfer process.

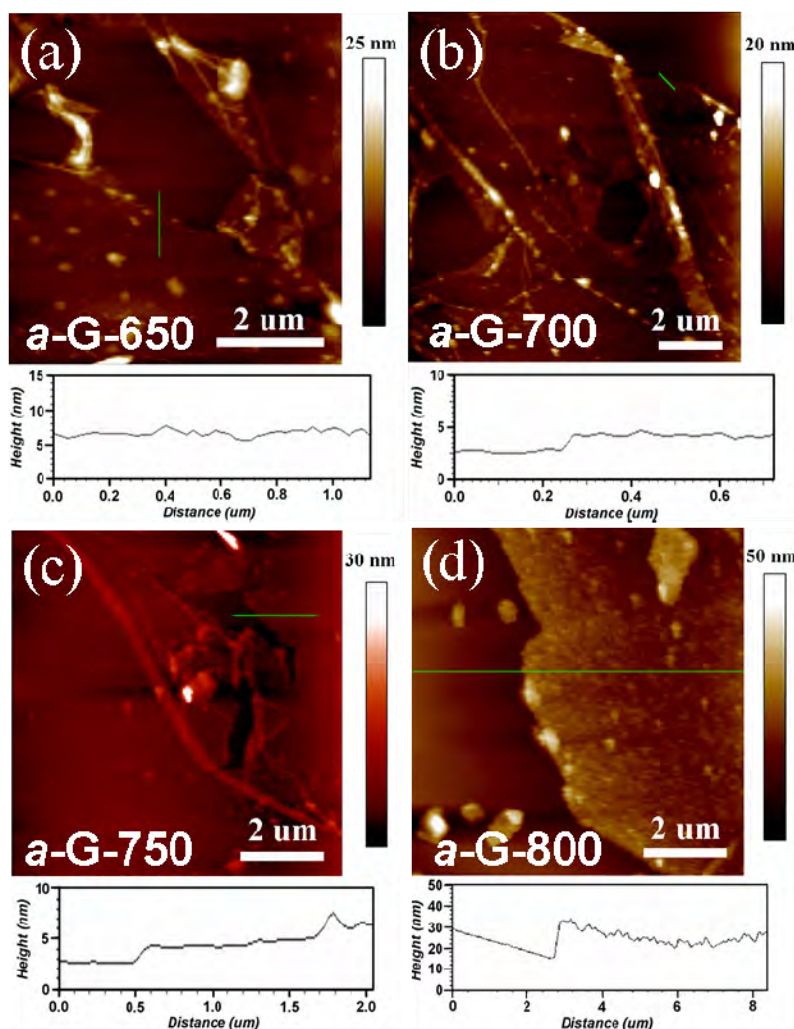

**Figure S2.** AFM images and height profiles of *a*-G-650 (a), *a*-G-700 (b), *a*-G-750 (c) and *a*-G-800 film on SiO<sub>2</sub>/Si substrate (d).

#### S4. TEM image and SAED pattern of N-*a*-G-700 film

The typical TEM image of N-*a*-G-700 film is given in Figure S3a. The layer number of the film is 3-4, slightly more than that of *a*-G-700 film (2-3 layers). The SAED pattern of N-*a*-G-700 film in Figure S3b shows a halo ring, clearly suggesting its amorphous characteristics.

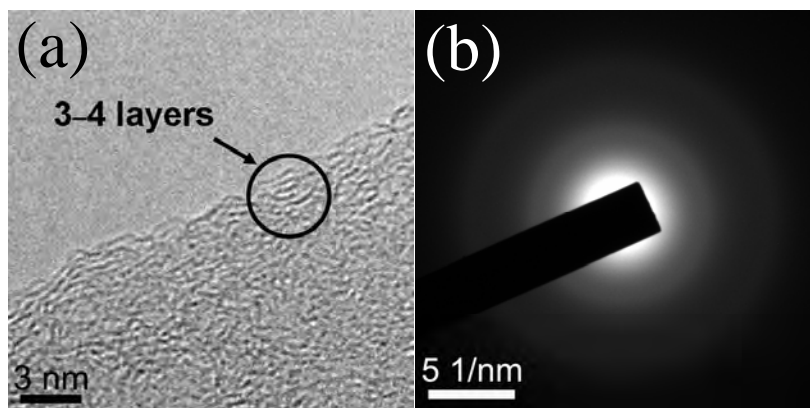

**Figure S3.** TEM image (a) and SAED pattern (b) of N-*a*-G-700 film.

#### S5. Plots of conductivity as a function of transmittance

Figure S4 gives the plots of conductivity as a function of transmittance (at 550 nm) for the undoped and N-doped *a*-graphene films. It's learnt that at a same transmittance, the conductivity of N-doped *a*-graphene film is higher than that of the undoped one, which should come from the contribution of additional electrons from the nitrogen dopants.

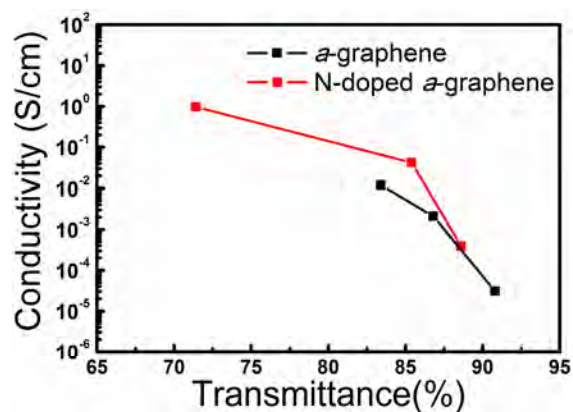

**Figure S4.** Plots of conductivity as a function of transmittance (at 550 nm) for the undoped and N-doped a-graphene films.

## References

- 1 A. Gupta, G. Chen, P. Joshi, S. Tadigadapa, P. C. Eklund, *Nano Lett.* 2006, **6**, 2667–2673.
- 2 X. Li, X. Wang, L. Zhang, S. Lee, H. J. Dai, *Science*, 2008, **319**, 1229–1232.
- 3 A. Reina, X. T. Jia, H. John, N. Daniel, S. Hyungbin, B. Bulovic, M. S. Dresselhaus, J. Kong, *Nano Lett.*, 2009, **9**, 30-35.
